# Supplementary material for: Direct targeted therapy for MLL‐fusion‐driven high‐risk acute leukaemias
Source: PubMed Central journal article supplement (PMC9214753; doi:10.1002/ctm2.933), 2022-06-22
Supplement: CTM2-12-e933-s001.pdf [file CTM2-12-e933-s001.pdf]

**Supplementary table 1**

| Chemical name                 | Fluc/Rluc ratio |
|-------------------------------|-----------------|
| Control                       | 1.00            |
| Niclosamide                   | 0.01            |
| Disulfiram                    | 0.61            |
| Hydralazine hydrochloride     | 0.17            |
| Fenbendazole                  | 0.63            |
| Doxorubicin hydrochloride     | 0.64            |
| Phenazopyridine hydrochloride | 0.49            |
| Leflunomide                   | 0.50            |
| Indoprofen                    | 0.36            |
| Nabumetone                    | 0.56            |
| Amlexanox                     | 0.11            |
| Ipriflavone                   | 0.10            |
| Nitazoxanide                  | 0.06            |

Lucefirase/Renilla ratio from compounds of positive hits from figure 1E.

Supplementary Figures:

Figure S1

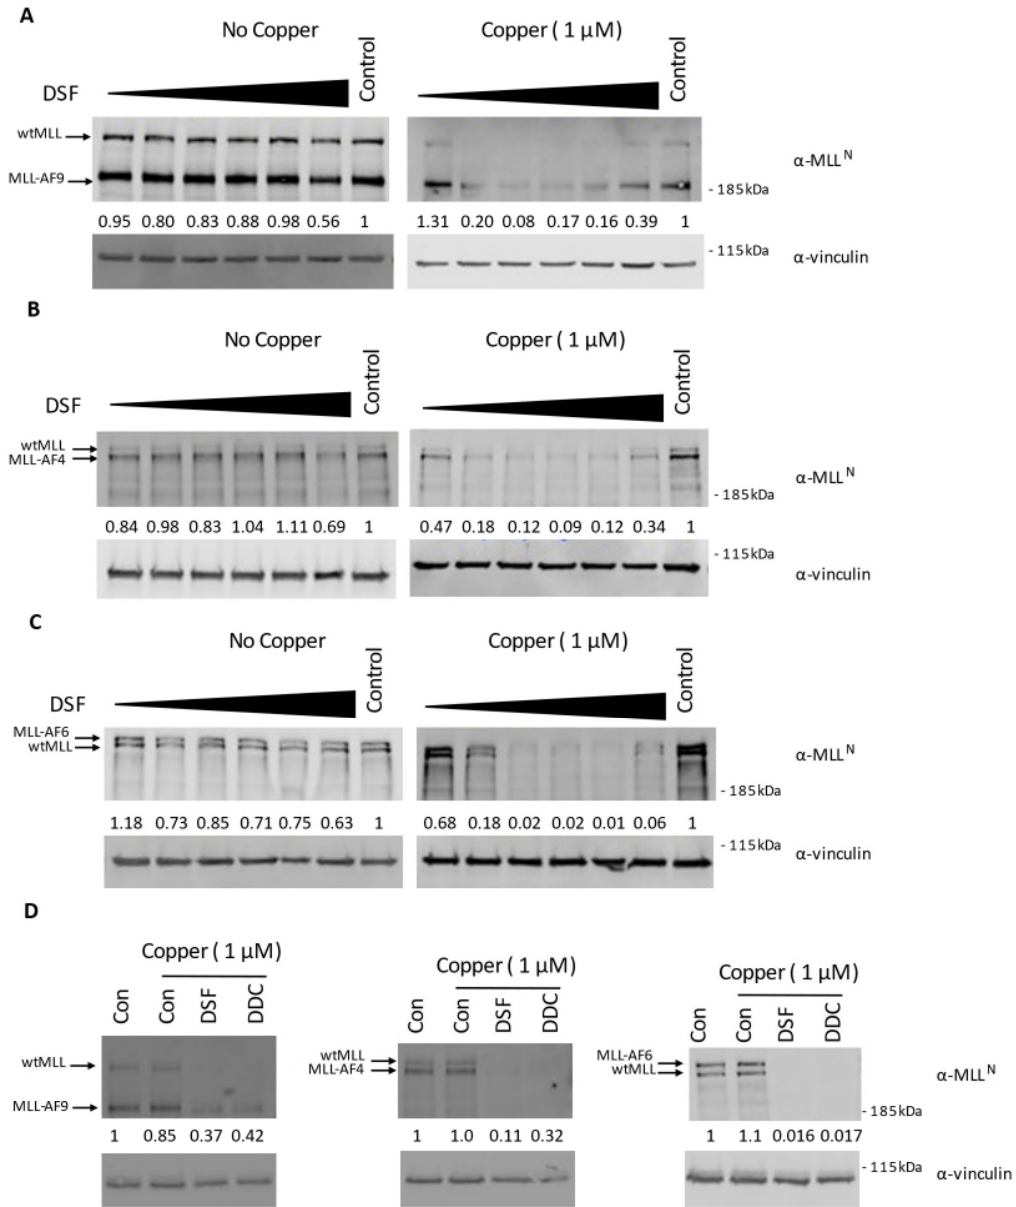

|         | Raw MLL Signal |       |       |
|---------|----------------|-------|-------|
|         | MV4-11         | THP-1 | SHI-1 |
| Con     | 166            | 895   | 584   |
| Cu      | 261            | 988   | 663   |
| DSF +Cu | 6.85           | 194   | 2.2   |

|         | Raw Vinculin Signal |       |       |
|---------|---------------------|-------|-------|
|         | MV4-11              | THP-1 | SHI-1 |
| Con     | 9800                | 10800 | 11000 |
| Cu      | 11800               | 14600 | 10500 |
| DSF +Cu | 11600               | 9490  | 11400 |

**Fig. S1. DSF-copper combination inactivates MLL-fusions and wild-type MLL**

Western blot analysis of MLL-fusion proteins. **(A-B-C)** Protein samples from *MLL* rearranged cells treated with the increasing concentrations of DSF with or without the supplementation of 1 $\mu$ M Cu for 16h. The proteins were detected using antibodies against the N-terminal MLL and vinculin. Numbers underneath each lane represent normalized densitometric quantification. **(D)** Protein samples from *MLL* rearranged cells treated with 0.3 $\mu$ M DSF or 0.6 $\mu$ M DDC and supplemented with 1 $\mu$ M Cu treated for 16h. Tables show raw densitometer data from the above western blots.

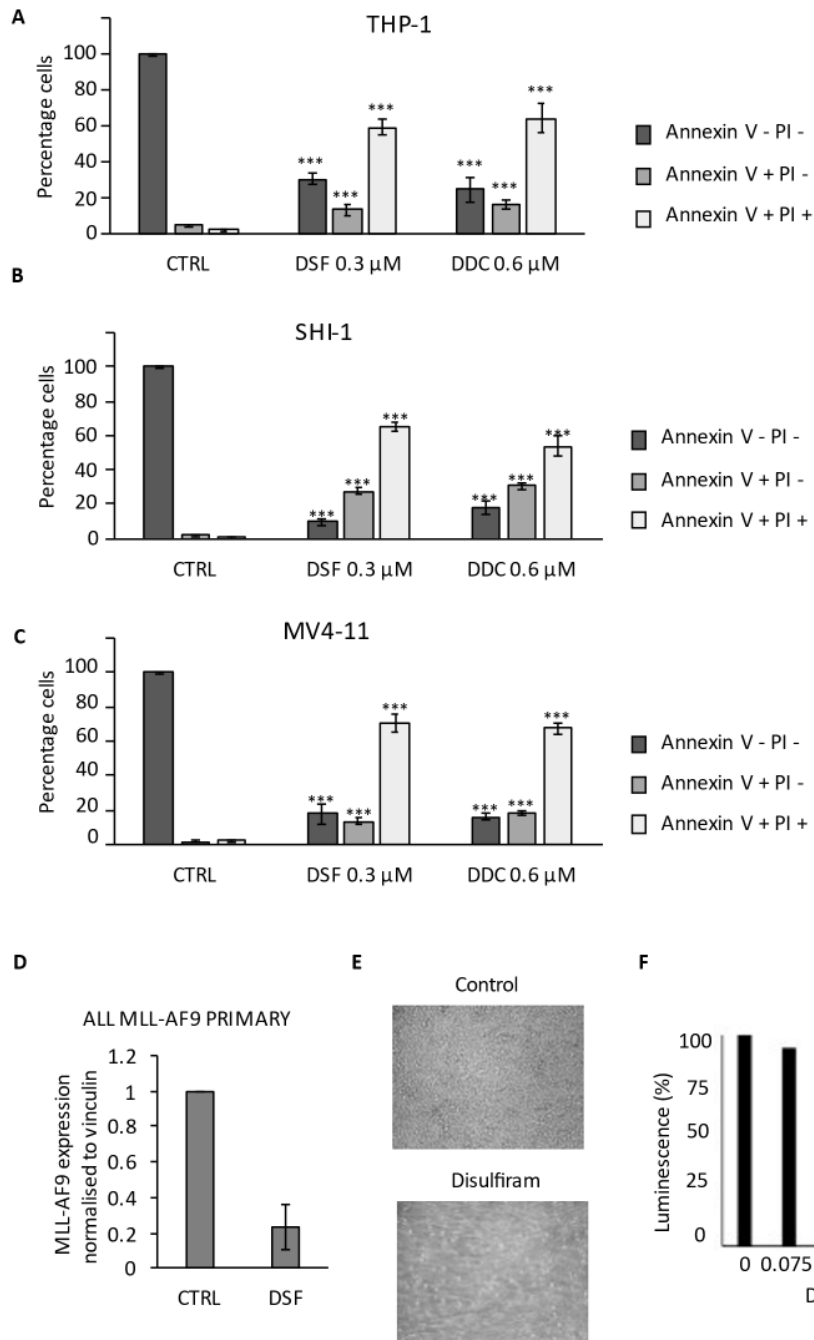

**Fig. S2. DSF-copper effect on cell death and primary samples.**

(A-B-C) DSF and DDC induce cell death after 48h of treatment. MLL-AF9, MLL-AF6, MLL-AF4-expressing cells were treated with 0.3 $\mu$ M DSF or with 0.6 $\mu$ M DDC and both

supplemented with 1 $\mu$ M Cu for 48h. Annexin-PI staining was performed and flow cytometry analysis results were plotted. The error bars represent SEM of three independent experiments. Bar charts are mean $\pm$ s.d. Significant changes versus equivalent control population is indicated (t-test, \*: P<0.05, \*\*: P<0.01, \*\*\*: P<0.001).

**(D)** Quantification of Western blot analysis of DSF effect on patient derived ALL MLL-AF9 cells. MLL-AF9 ALL cells were treated with 0.3 $\mu$ M DSF and 1 $\mu$ M Cu for 16h. The proteins were detected using antibodies against the N-terminal MLL and vinculin. **(E)** Phase contrast photographs of patient derived ALL MLL-AF9 cells in a human mesenchymal stem cell co-culture with or without treatment. **(F)** Patient derived ALL MLL-AF9 cells were transduced to express the firefly luciferase and then seeded on MSCs for two weeks in presence of different doses of DS and 1 $\mu$ M of Cu. Bioluminescence was measured using the FLUOstar Omega microplate reader after adding the firefly luciferase substrate. Plot shows relative luminescence in treated and untreated cells.

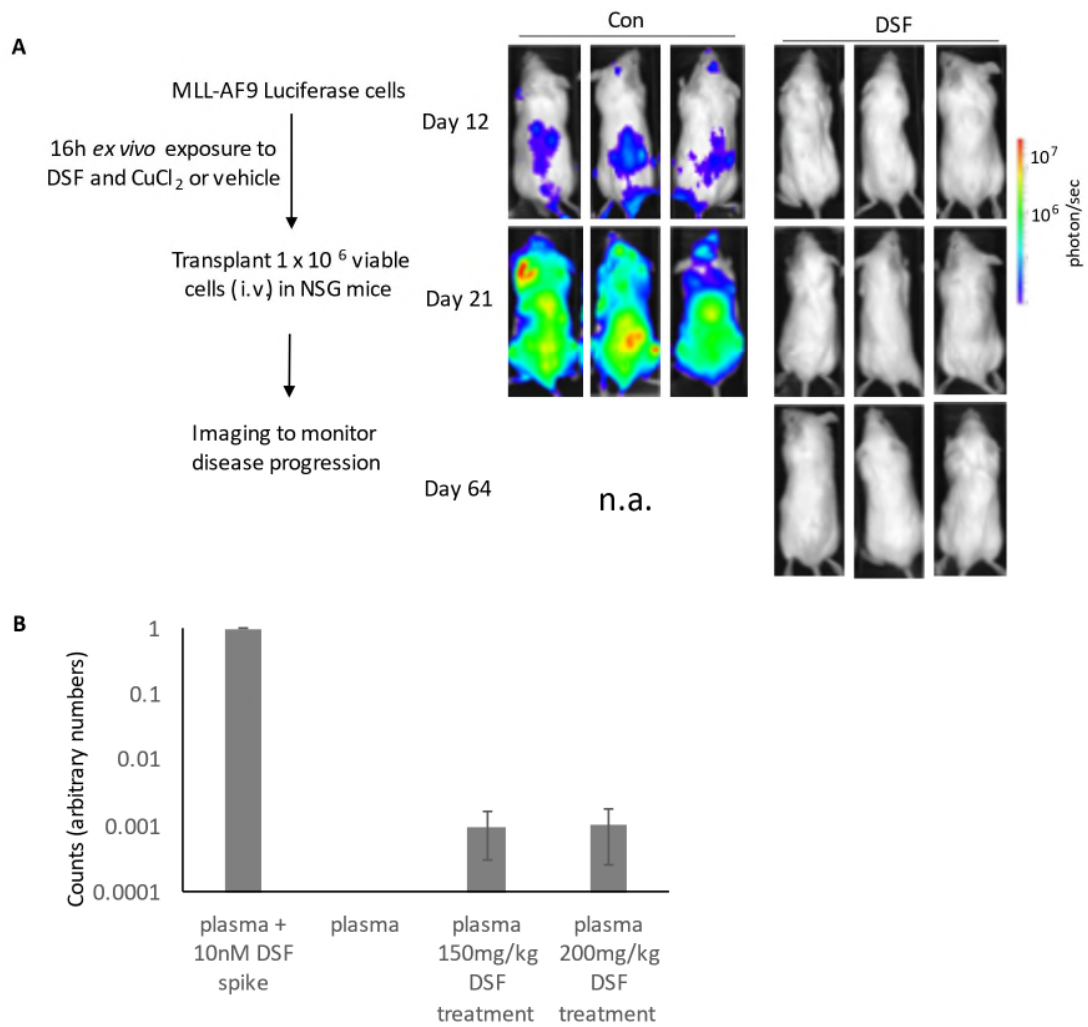

**Fig. S3. Leukemic engraftment after *ex vivo* exposure to DSF-copper.**

**(A)** Bioluminescence imaging of NSG recipient mice 10 days after injection with one million THP-1-Luciferase cells either treated with DSF/Cu or vehicle control for 16h. **(B)** Relative DSF concentration in plasma DSF or Con treated mice established with Liquid chromatography–mass spectrometry analysis.

Figure S4

A

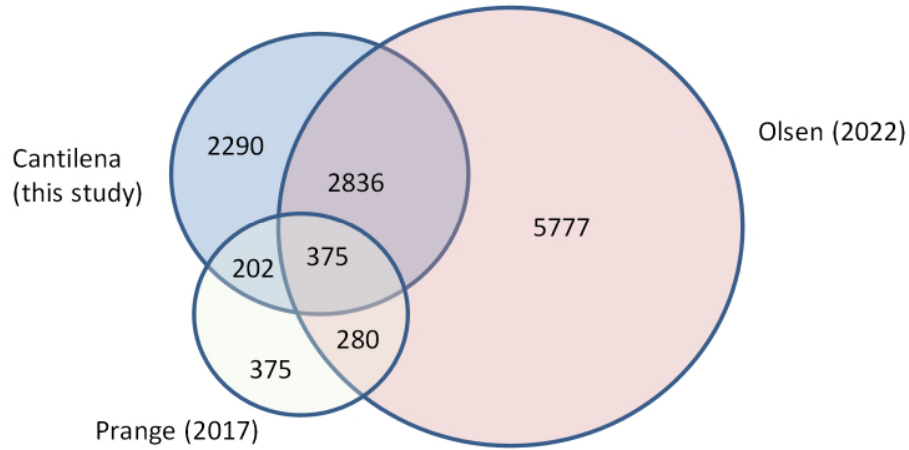

B

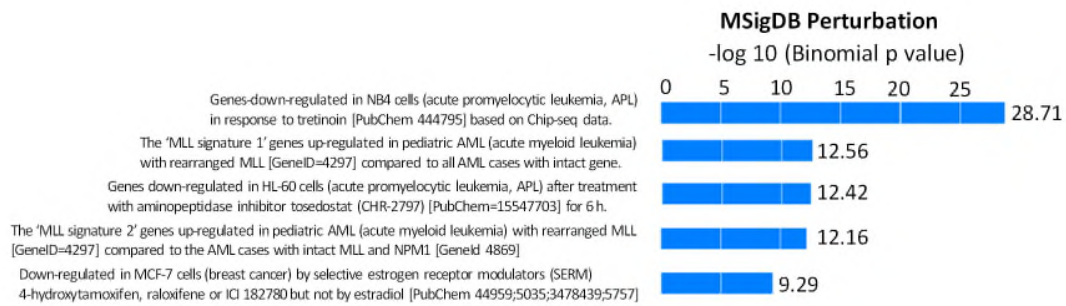

Fig. S4. Correlation of epigenetic changes with leukemic transcriptional programs.

(A) Venn diagram of the MLL-AF9 binding sites identified in this study and Prange *et al* (2017) and Olsen *et al* (2022). (B) The perturbation analysis showed enrichment of the 873 genes in APL and in *MLL* rearranged AML gene sets.
